# Supplementary material for: Freon–CO2-assisted purification of single-walled carbon nanotubes
Source: Royal Society of Chemistry journal article supplement (doi:10.1039/d4na00610k), 2024-01-01
Supplement: d4na00610k1.pdf [file d4na00610k1.pdf]

## Electronic Supplementary Information

### Freon-CO<sub>2</sub>-assisted purification of single-walled carbon nanotubes

Yiman Huang<sup>a</sup>, Xiao Zhu<sup>a,\*</sup>, Tao Chen<sup>b</sup>, Hongyan Li<sup>b</sup>, Liang Han<sup>c</sup>, Xilai Jia<sup>c,\*</sup>

<sup>a</sup> College of Science, China Agricultural University, Beijing 100091, P. R. China.

<sup>b</sup> State Grid Jilin Electric Power Research Institute, Changchun, 130021, P. R. China.

<sup>c</sup> School of Materials Science and Engineering, University of Science and Technology Beijing, Beijing 100083, P. R. China.

\*Corresponding Author E-mail: zhuxiao@cau.edu.cn, jiaxl@ustb.edu.cn

**Table S1.** Experimental details of the SWCNT and MWCNT samples

| Sample | Air pre-oxidation | CO <sub>2</sub> | CO <sub>2</sub> +Freon | 0.01 mol L <sup>-1</sup> | 6 mol L <sup>-1</sup> | Freon |
|--------|-------------------|-----------------|------------------------|--------------------------|-----------------------|-------|
|        |                   |                 |                        | HCl                      | HCl                   |       |
| RS     |                   |                 |                        |                          |                       |       |
| AS     | √                 |                 |                        |                          | √                     |       |
| CS     | √                 | √               |                        |                          | √                     |       |
| CF     | √                 |                 | √                      | √                        |                       |       |
| CF-1   | √                 |                 | √                      |                          | √                     |       |
| CF-2   | √                 | √               |                        |                          | √                     | √     |
| RS-M   |                   |                 |                        |                          |                       |       |
| CF-M   | √                 |                 | √                      | √                        |                       |       |
| CF-M1  | √                 |                 | √                      |                          | √                     |       |

For RS, its purity is 85.8%, the mass of the sample is 0.2 g. Represented by the element iron, the amounts of related substances are as follows:

---

$$(0.2 \text{ g} \times (1 - 85.8\%)) / 55.85 \text{ g mol}^{-1} = 0.00051 \text{ mol} \quad (55.85 \text{ g mol}^{-1} - \text{Fe})$$

$$(0.2 \text{ g} \times (1 - 85.8\%)) / 79.85 \text{ g mol}^{-1} = 0.00036 \text{ mol} \quad (79.85 \text{ g mol}^{-1} - \text{Fe}_2\text{O}_3)$$

The reaction equations of HCl with Fe and Fe<sub>2</sub>O<sub>3</sub> are as follows:

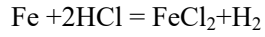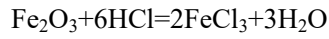

To ensure the solid-liquid ratio of four thousandths of the case, the amount of HCl needs to reach 0.001-0.0022 mol, the corresponding concentration of HCl is 0.01-0.02 mol L<sup>-1</sup>. Considering that some metal impurities will react with chlorine, the concentration of 0.01 mol L<sup>-1</sup> is enough.
